# Supplementary material
Source: PubMed Central journal article supplement (PMC9673076)
Supplement: NIHMS1846515-supplement-Supplemental_data.pdf [file NIHMS1846515-supplement-Supplemental_data.pdf]

## Supplemental Figure 1.

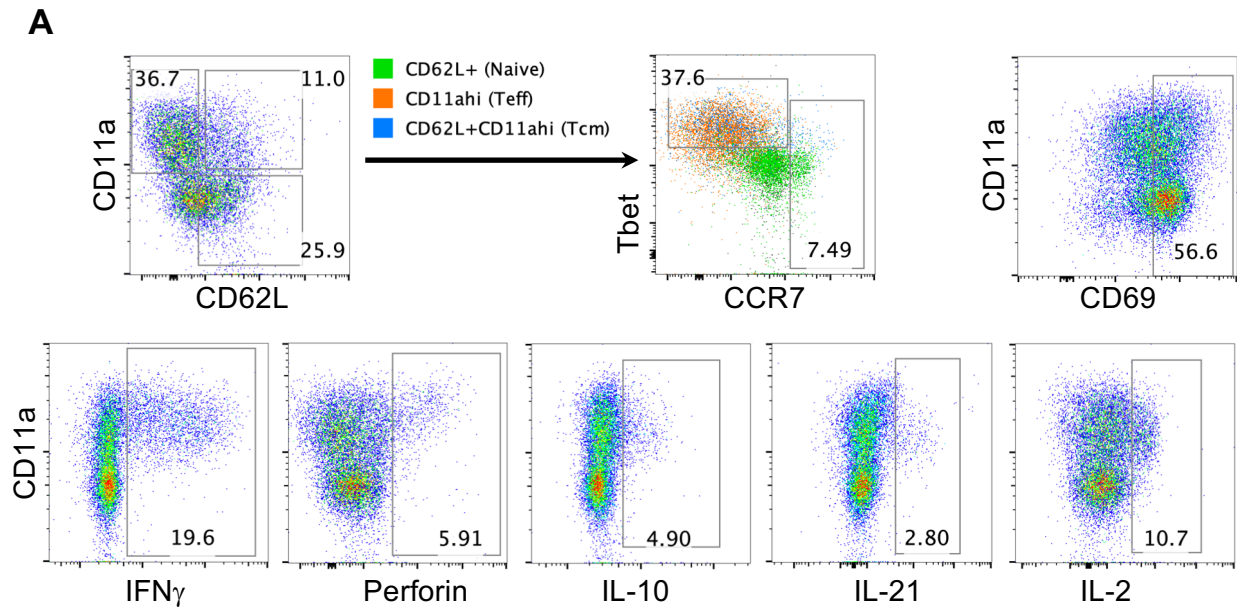

|               | UMAP Population: |                |                    |                   |                   |                    |                   |                   |                 |                    |
|---------------|------------------|----------------|--------------------|-------------------|-------------------|--------------------|-------------------|-------------------|-----------------|--------------------|
|               | CD4 Tnaive<br>p1 | CD4 Teff<br>p2 | CD4 Teff/Tr1<br>p3 | Foxp3 cTreg<br>p4 | Foxp3 eTreg<br>p5 | Foxp3 exTreg<br>p6 | CD8 Tnaive1<br>p7 | CD8 Tnaive2<br>p8 | CD8 aTeff<br>p9 | CD8 Tn/Treg<br>p10 |
| CD4           | 99.9             | 99.5           | 99.9               | 98.1              | 99.8              | 100                | 0.98              | 0                 | 0.49            | 1.88               |
| CD8           | 0                | 0              | 0                  | 0.78              | 0.045             | 0                  | 98.7              | 99.6              | 98              | 96.7               |
| Foxp3         | 0.31             | 2.04           | 0.63               | 31.2              | 85.1              | 94.8               | 1.95              | 0.51              | 4.45            | 24.4               |
| Bcl6          | 3.08             | 12.8           | 7.09               | 2.41              | 14.1              | 7.79               | 0.65              | 2.93              | 12.7            | 6.1                |
| Tbet          | 1                | 65.5           | 83.3               | 29.4              | 53.1              | 42.9               | 12.1              | 5.73              | 93.4            | 14.1               |
| IFNγ          | 0.57             | 36.1           | 99.9               | 0.85              | 9.73              | 1.3                | 0                 | 1.53              | 56              | 5.63               |
| IL10          | 0.057            | 1.83           | 14.4               | 0.078             | 0.45              | 1.3                | 0.33              | 0                 | 1.09            | 9.39               |
| IL21          | 0.2              | 10.3           | 22.4               | 0.62              | 8.05              | 2.6                | 0                 | 1.27              | 11.6            | 7.51               |
| IL2           | 4.57             | 26.8           | 73                 | 1.79              | 2.27              | 1.3                | 1.3               | 0.38              | 9.2             | 12.2               |
| Perforin      | 0.2              | 1.25           | 0.31               | 1.4               | 0.73              | 0                  | 0.33              | 0.64              | 45.7            | 4.69               |
| CD62L         | 45.8             | 0.47           | 0.42               | 38.8              | 9.05              | 0                  | 71                | 74.3              | 1.58            | 45.1               |
| CD11ahi       | 1.14             | 86             | 90.6               | 5.67              | 64.3              | 76.6               | 0.33              | 0.76              | 42.6            | 0                  |
| CD62L/CD11ahi | 0.49             | 3.24           | 1.77               | 31.6              | 9.55              | 11.7               | 5.86              | 2.8               | 41.4            | 0                  |
| CCR7          | 1.83             | 0.37           | 0                  | 34.5              | 0.41              | 0                  | 76.9              | 1.53              | 0               | 34.7               |
| CD69          | 78.6             | 52.2           | 61.9               | 23.4              | 55.7              | 76.6               | 2.93              | 55.1              | 61.9            | 48.8               |
| FR4           | 31.7             | 82.8           | 62.6               | 92.2              | 99.4              | 94.8               | 71.7              | 12.8              | 58.1            | 63.4               |
| PD1           | 2.6              | 86.3           | 85.4               | 95.3              | 84.9              | 93.5               | 89.3              | 5.85              | 95.1            | 96.7               |
| TIGIT         | 0.77             | 16.8           | 4.48               | 17.6              | 39.2              | 59.7               | 2.28              | 1.27              | 12              | 82.6               |
| Tim3          | 0.51             | 4.81           | 2.29               | 9.25              | 12.7              | 10.4               | 0.65              | 0.25              | 10.8            | 11.3               |
| Lag3          | 0.2              | 16.6           | 7.82               | 1.48              | 19.8              | 7.79               | 0.33              | 0.13              | 28.2            | 1.88               |
| KLRG1         | 0.086            | 0.63           | 0.63               | 5.52              | 0.64              | 100                | 0.33              | 0.25              | 9.2             | 5.16               |
| CD5           | 31355            | 60848          | 52279              | 43926             | 85705             | 94967              | 16477             | 20979             | 41544           | 11473              |

**Supplemental Figure 1. Functionally distinct T cell subpopulations infiltrate the pancreas during autoimmune diabetes.** Flow cytometric analysis of islet infiltrating T cells from pre-diabetic female NOD mice (n=7). **(A)** Select representative flow plots gated on all T cells. **(B)** UMAP clustering algorithm analysis was performed on concatenated sample that combined equal cell number representation from 7 separate mice. Analysis was performed using UMAP extension in FlowJo based on 22 parameters. Analysis is initially gated on TCR<sup>+</sup> T cells. Shown is the average percent positive or MFI of markers based on standard gating strategy of the 7 separate samples after gating on one of the 10 UMAP populations. The heatmaps for these markers was used to define 10 major T cell groups shown in Figure 1. Bolded numbers are key markers used to determine the lineage of the populations. The results are from one experiment.

## Supplemental Figure 2.

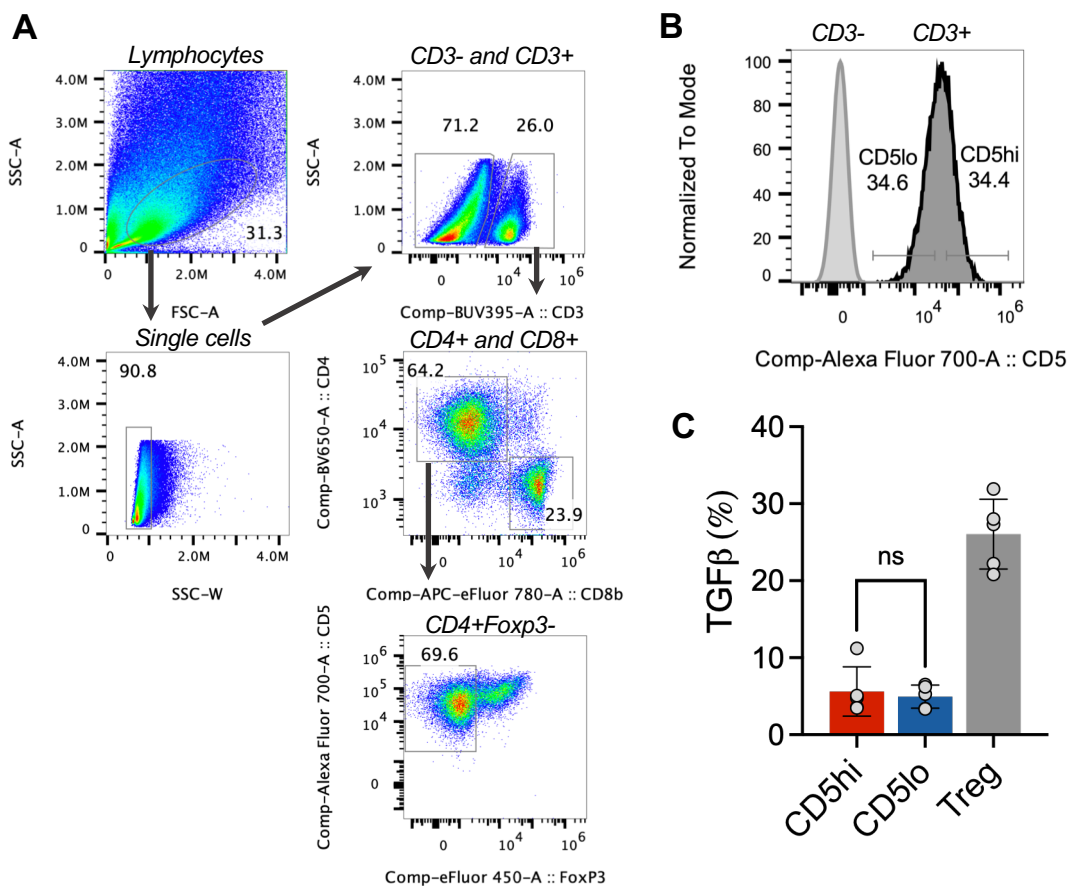

**Supplemental Figure 2.** (A, B) Example of gating strategy for CD5high and CD5low T cells. (A) Cells are gated on lymphocytes/single cells/CD3+ followed by CD4+/Foxp3- or CD8+. (B) CD5high/low gates were set as close as possible to 35% top and bottom CD5 expression. The CD5 gates were determined separately for each sample and for each T cell population (CD4 or CD8). (C) Islet infiltrating T cells were stimulated with PMA/ionomycin for 6 hours, and cells were stained with anti-LAP (pro-TGFβ). Since LAP is membrane-bound, BFA and monensin were omitted from the stimulation.

### Supplemental Figure 3.

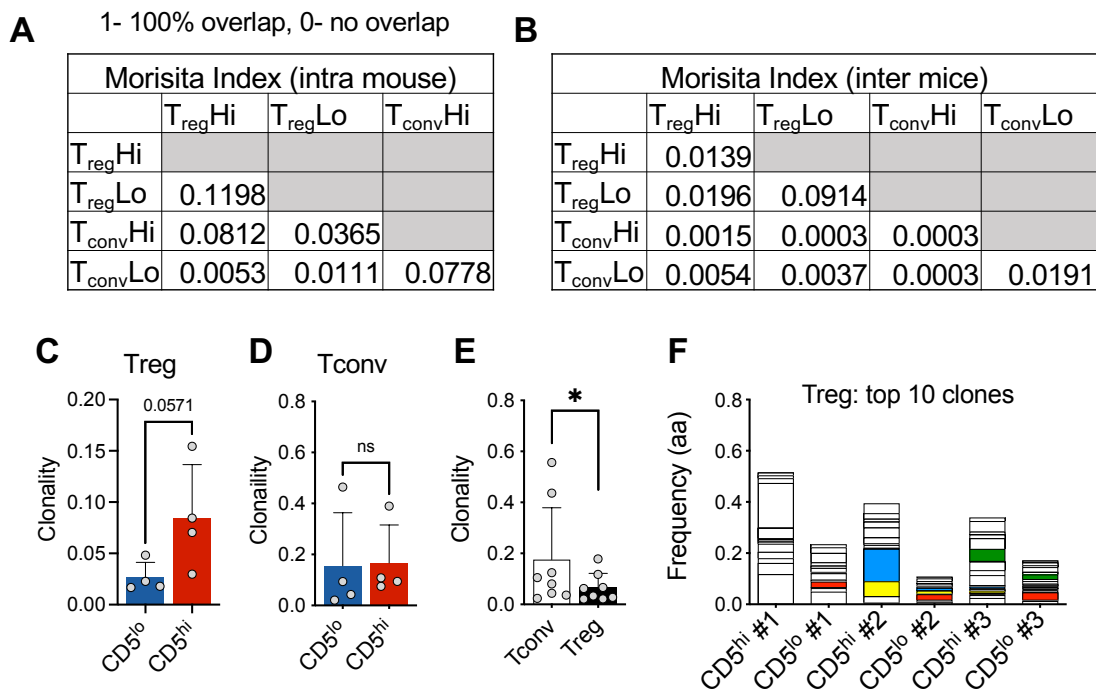

**Supplemental Figure 3. Distinct TCR repertoires of CD5<sup>high</sup> and CD5<sup>low</sup> T cells in pancreatic islets.** TCR-beta sequences were obtained from CD4<sup>+</sup> conventional (Foxp3<sup>GFP-</sup>) and Treg (Foxp3<sup>GFP+</sup>) cells sorted based on the level of CD5 expression from the infiltrated islets of NOD.Foxp3<sup>GFP</sup> mice. Sample overlap was calculated using Morisita index for amino acid sequences of TCR-beta sequences between cell populations within each mouse (n=4, **A**) or between samples of different mice (**B**). (**C**, **D**, **E**) Clonality of the TCR repertoire was calculated as an inverse of normalized Shannon entropy. (**C** and **D**, intra-mouse analysis, n=4; **E**, inter-mouse analysis, n=8). (**F**) Frequencies of top 10 T cell clones in Treg population. Colored bars designate CDR3 shared between samples. Data are from a single experiment of 4 mice. Statistical analysis was performed using Adaptive software suite or Prism. Error bars designate mean  $\pm$  SD, \*p<0.05; \*\*p<0.01; \*\*\*p<0.001.

## Supplemental Figure 4.

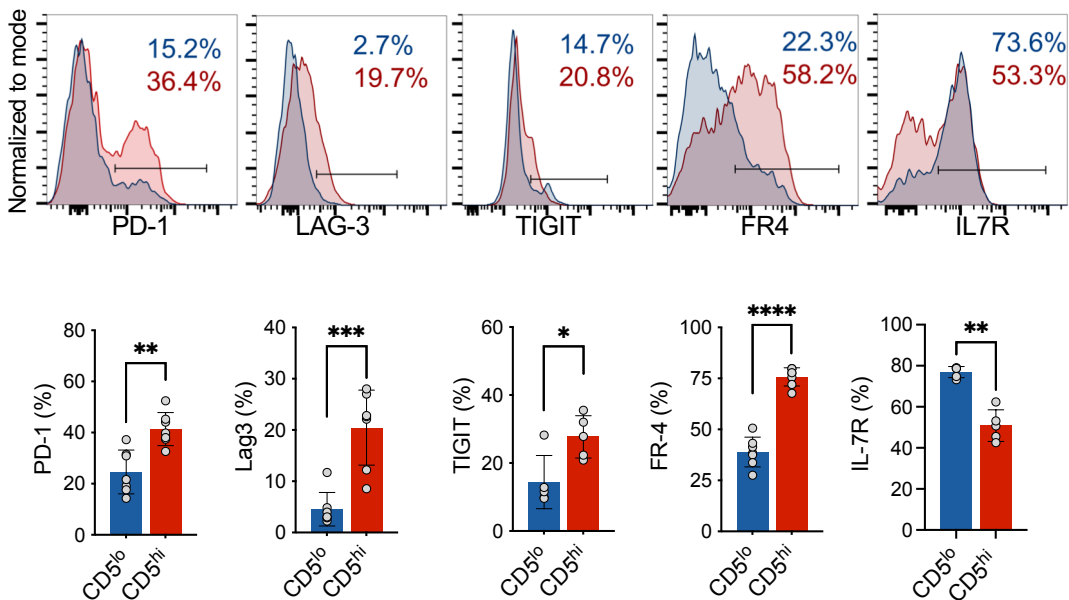

**Supplemental Figure 4. Increased activation and differentiation of CD5<sup>high</sup> islet infiltrating Tconvs.** Representative flow cytometric analysis and quantification of PD-1, LAG-3, FR-4, TIGIT and IL7R expression on islet infiltrating CD4<sup>+</sup> Tconvs in 10-14 week old NOD mice. Blue – CD5<sup>low</sup>, Red - CD5<sup>high</sup>. Analysis is gated on CD4<sup>+</sup>TCR<sup>+</sup>Foxp3<sup>-</sup>CD5<sup>hi/lo</sup> cells. Results displayed are from at least two independent experiments. Statistical analysis was performed using Mann-Whitney test (n=5-7). All data Error bars designate mean  $\pm$  SD with each point representing a single mouse, \*p<0.05; \*\*p<0.01; \*\*\*p<0.001; \*\*\*\*p<0.001.

## Supplemental Figure 5.

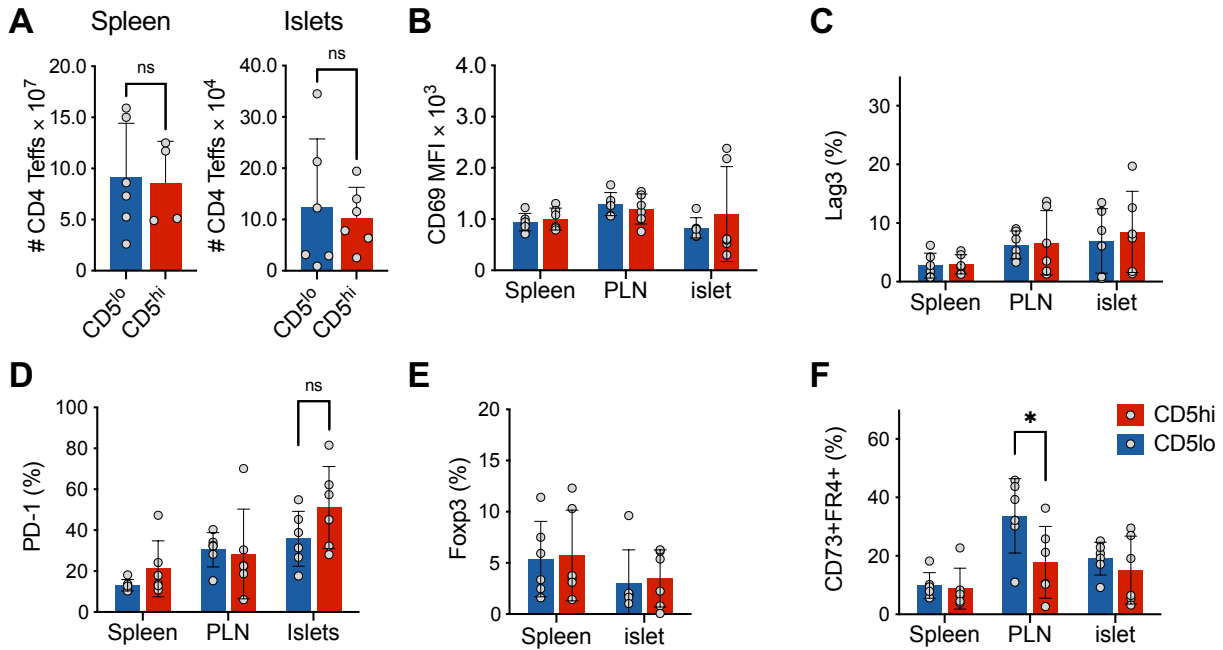

**Supplemental Figure 5. Functional phenotype of CD5<sup>high</sup> and CD5<sup>low</sup> CD4<sup>+</sup> islet infiltrating T cells post transfer.** CD5<sup>high</sup> and CD5<sup>low</sup> CD4<sup>+</sup> Tconv (Foxp3<sup>GFP-</sup>) were sorted from infiltrated islets of NOD.Foxp3<sup>GFP</sup> mice and transferred into NOD.TCR $\alpha^{-/-}$  recipients. Recipient mice were analyzed at endpoint (at diabetes onset). (A) CD4<sup>+</sup> T cell numbers in spleens or islets of recipient mice. (B-F) Combined analysis of 6 separate mice. PLN – pancreatic draining lymph node; islet – isolated pancreatic islets. Results displayed are from at least two independent experiments, n=6. Statistical analysis was performed using Mann-Whitney. Error bars designate mean  $\pm$  SD with each point representing a single mouse, \*p<0.05; \*\*p<0.01.
